# Supplementary material for: Metabolic fingerprinting of cell types in mouse skeletal muscle by combining TOF-SIMS with immunofluorescence staining
Source: Royal Society of Chemistry journal article supplement (doi:10.1039/d0an00738b), 2020-01-01
Supplement: d0an00738b1.pdf [file d0an00738b1.pdf]

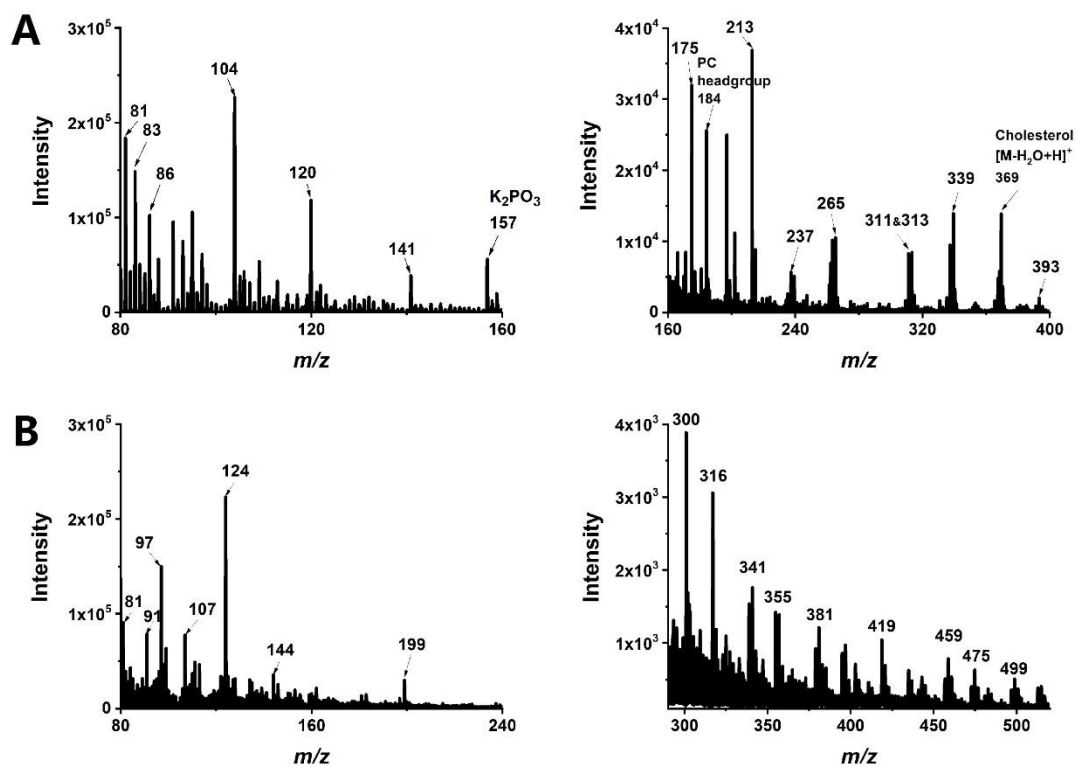

**Supplemental Fig. 1** Mass spectra of other intense peaks in positive (A) and negative (B) ion modes.

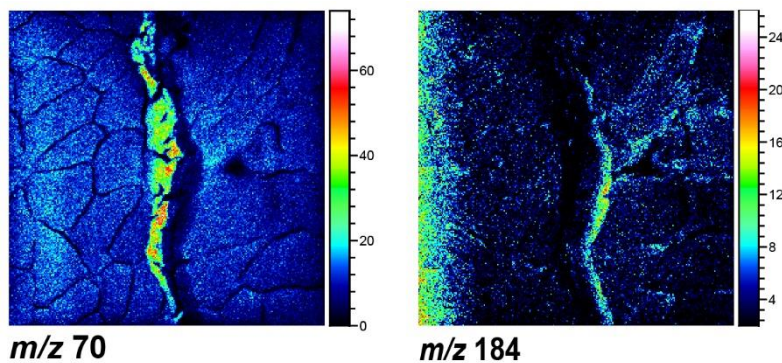

**Supplemental Fig. 2** MSIs of other intense peaks in different muscle regions. Peaks including  $m/z$  70 and  $m/z$  184 were imaged in positive ion mode. Area of  $300 \times 300 \mu m^2$  on the mouse skeletal muscle section.

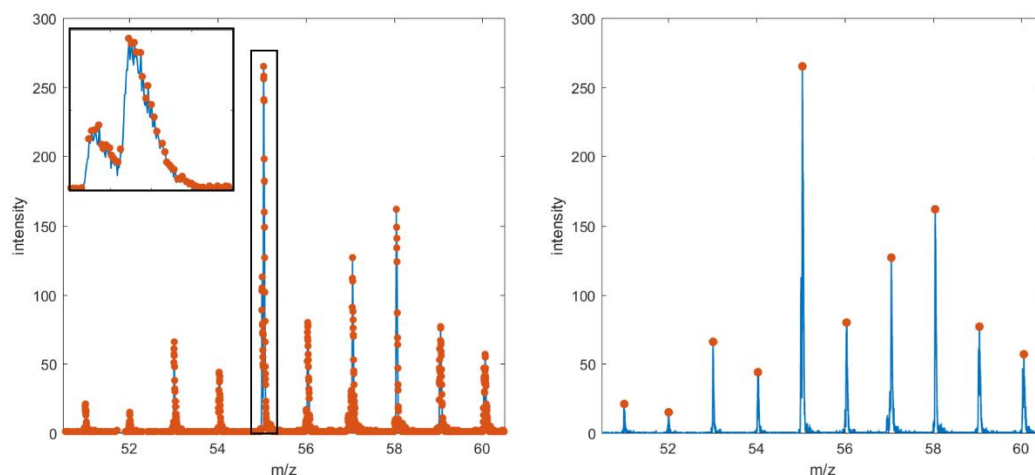

**Supplemental Fig. 3 Peak detection comparison between MATLAB *findpeaks* function and the optimized peak searching algorithm.** Left panel: the library function *findpeaks* of MATLAB generated over-extracted results due to the noisy background of the MS data. The inserted figure with bold lines showed the magnified observation of local signals. Right panel: optimized peak searching algorithm searched for the local maxima within a defined *m/z* range, generating more accurate peak location results than the MATLAB *findpeaks* function.

### Source code of the peak searching algorithm

```
function [ pkLocs,pksIntens,I ] = RoughFindPeaks( locs,profiles,halfAcc,minTor,isShow )
    if ~exist('isShow','var')
        isShow = 1;
    end
    if ~exist('minTor','var')
        minTor = 0.01;
    end
    pkLocs = matList();
    pksIntens = matList();
    I = matList();
    torIntens = max(profiles) * minTor;
    L = length(locs);
    indices = 1:L;
    m = 1;
    while(m<=L)
        dist = abs(locs - locs(m));
        bInRange = dist <= halfAcc;
        [intens,locId] = max(profiles(bInRange));
        idsInRange = indices(bInRange);
        if intens > torIntens
            maxId = idsInRange(locId);
        end
        m = m + 1;
    end
end
```

```

        if maxId < m
            m = max([m+1,idsInRange(end)]);
        elseif maxId > m
            m = maxId;
        else
            I.addOne(m);
            pkLocs.addOne(locs(m));
            pksIntens.addOne(profiles(m));
            m = max([m+1,idsInRange(end)]);
        end
    end
else
    m = max([m+1,idsInRange(end)]);
end
end
pkLocs = cell2mat(pkLocs.data);
pksIntens = cell2mat(pksIntens.data);
I = cell2mat(I.data);
if isShow
    figure;
    plot(locs,profiles);
    hold on;
    scatter(pkLocs,pksIntens,'filled');
end
end

```

```

classdef matList < handle

```

```

    properties(SetAccess=private)

```

```

        capacity;
        len;
        data;

```

```

    end

```

```

    methods

```

```

        function obj = matList(initCap)

```

```

            if ~exist('initCap','var')

```

```

                initCap = 100;

```

```

            end

```

```

            obj.capacity = initCap;

```

```

            obj.data = cell(obj.capacity,1);

```

```

            obj.len = 0;

```

```

        end

```

```

function addOne(obj,mat)
    if obj.len == obj.capacity
        obj.expandCap();
    end
    obj.len = obj.len + 1;
    obj.data{obj.len} = mat;
end

function b = isExist(obj,mat)
    b = any(cellfun(@(x)isequal(x,mat),obj.data(1:obj.len)));
end

function [b,m] = isExist2(obj,mat,acc)
    b = 0;
    if ~exist('acc','var')
        acc = 1e-6;
    end
    for m = 1:obj.len
        b = all(abs(obj.data{m}-mat)<acc);
        if b
            return;
        end
    end
    m = -1;
end

function replaceEle(obj,index,newEle)
    obj.data{index} = newEle;
end

function saveAsTable(obj,fileName,varNames)
    L = length(obj.data{1}(:));
    if L ~= length(strsplit(varNames','))
        error('matList: varNames length %d is inconsist to the data length %d!',...
            length(varNames),L);
    end
    tmp = cellfun(@(x)length(x(:)),obj.data(1:obj.len));
    if any(tmp~=L)
        error('matList: there exists inconsist data length among data');
    end
    t = cell2mat(cellfun(@(x)x(:),obj.data(1:obj.len),'UniformOutput',0));
    HScsvwrite(fileName,t,[],varNames);
end

```

```

function saveAsMAT(obj,fileName)
    data = obj.data(1:obj.len);
    save(fileName,'data');
end

function r = toMat(obj)
    r = cell2mat(obj.data(1:obj.len));
end

function r = toCell(obj)
    r = obj.data(1:obj.len);
end
end

methods(Access=private)
    function expandCap(obj)
        tmp = cell(2*obj.capacity,1);
        tmp(1:obj.len,:) = obj.data;
        obj.data = tmp;
        obj.capacity = 2 * obj.capacity;
    end
end

end

function [] = HScsvwrite(fileName,M,strId,varargin)
    fid = fopen(fileName,'a');
    if isempty(strId)
        isStr = false;
    else
        isStr = true;
    end
    [R,L] = size(M);
    if ~isempty(varargin)
        header = varargin{1};
        fprintf(fid,[header,'\n']);
    end
    strLine = repmat('%f',L);
    if isStr
        idNum = size(strId,2);
        strFormat = repmat('%s',idNum);
    end
    for m = 1:L
        if isStr

```

```
        fprintf(fid,strFormat,strId{m,:});
    end
    fprintf(fid,strLine,M(m,:));
end
fclose(fid);
end

function strline = repStrline(str,num)
    tmp = repmat(str,1,num);
    strline = [tmp(1:end-1),'\n'];
end
```
